# Supplementary material for: Microbiota and Resistome Analysis of Colostrum and Milk from Dairy Cows Treated with and without Dry Cow Therapies
Source: MDPI journal article supplement (doi:10.3390/antibiotics12081315), 2023-08-14
Supplement: s1 [file s1]

## Supplementary material

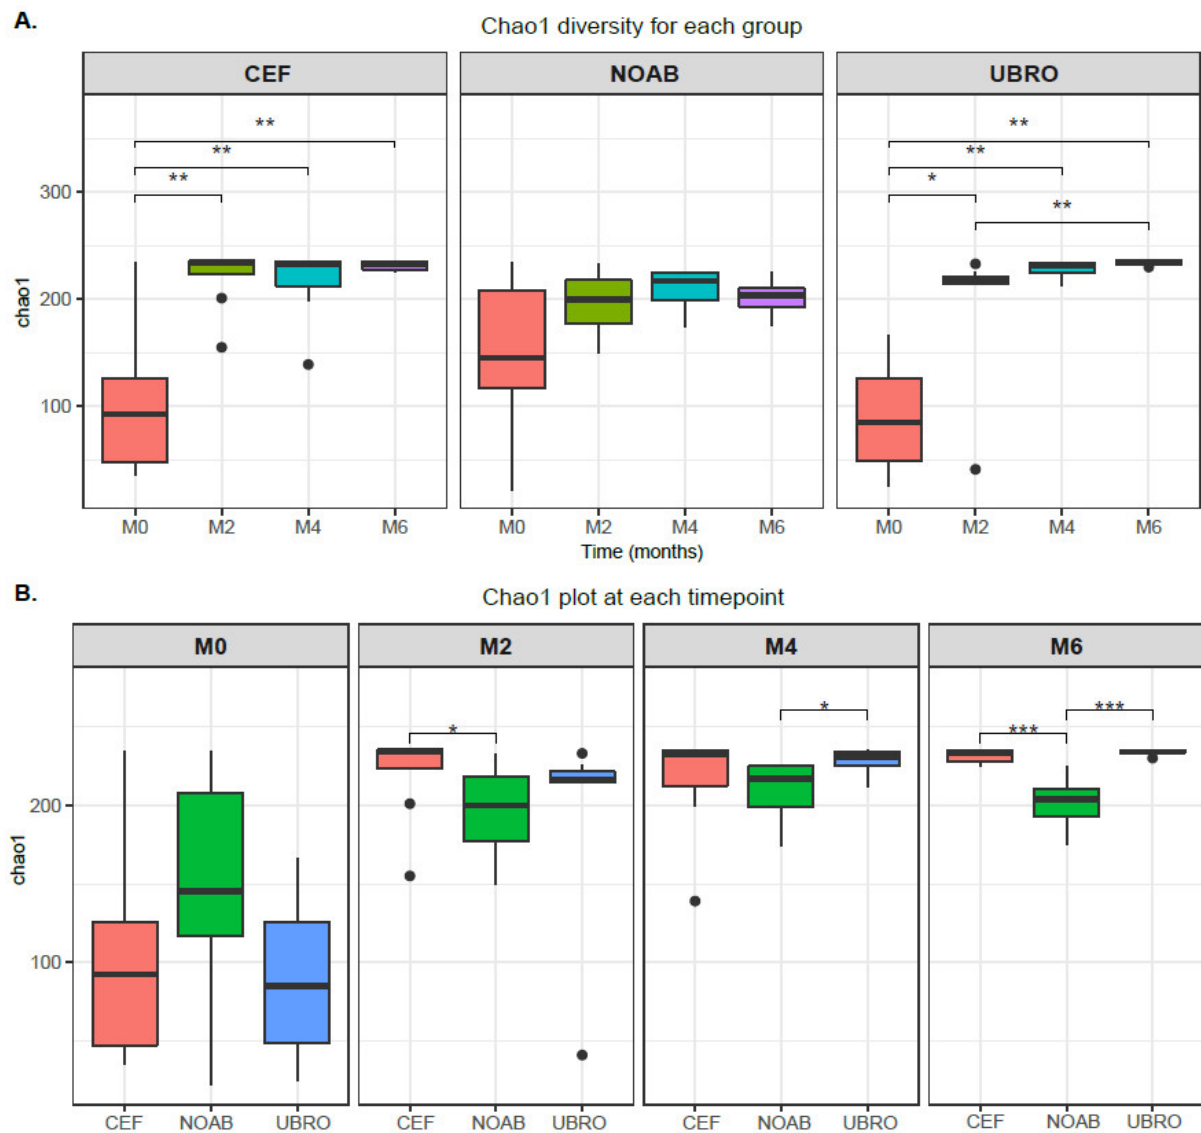

**Figure S1.** Alpha diversity for microbial composition as calculated by Chao1 index (A)

Between groups and (B) Between time points.

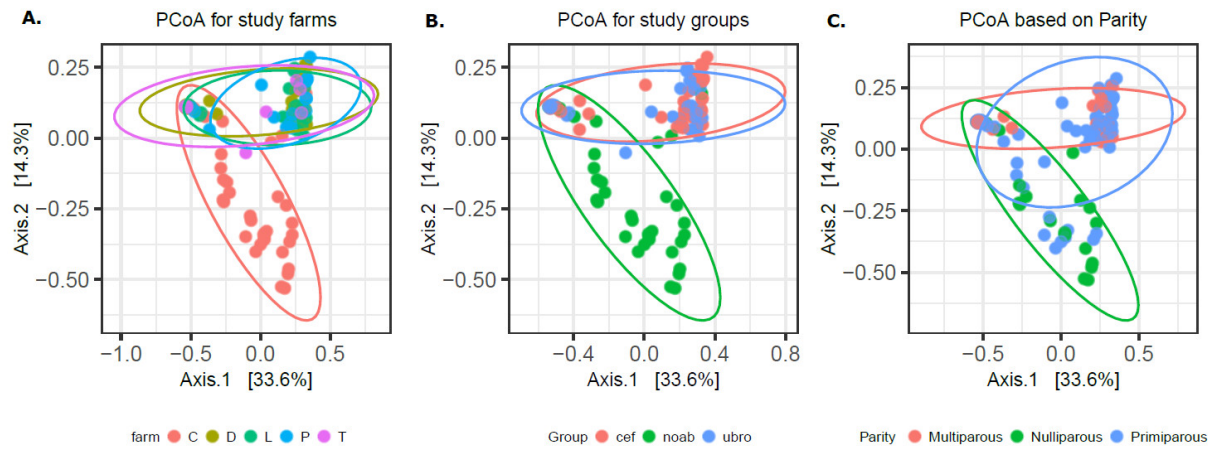

**Figure S2.** PCoA using Bray-Curtis dissimilarity measure showing distinct clustering based on (A) Farms, (B) Study groups and (C) Parity.

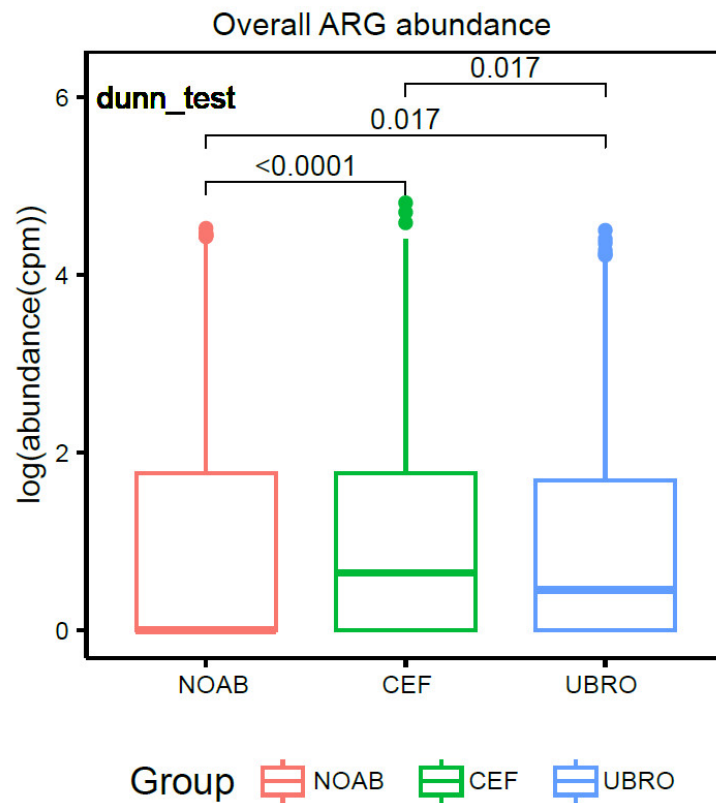

**Figure S3.** Boxplot showing overall ARG abundance in all three groups. P.adj values were calculated using Dunn test in R, and p.adj values below 0.05 were considered significant.

**Table S1.** Table showing PERMANOVA results for tests based on farms, study groups and parity.

| pairs                      | R2       | p.adjusted |
|----------------------------|----------|------------|
| <b>Farms</b>               |          |            |
| C vs D                     | 0.11386  | 0.006667   |
| C vs L                     | 0.119911 | 0.005      |
| C vs P                     | 0.147541 | 0.005      |
| C vs T                     | 0.067837 | 0.036      |
| D vs L                     | 0.044919 | 0.2025     |
| D vs P                     | 0.085468 | 0.036      |
| D vs T                     | 0.051612 | 0.322222   |
| L vs P                     | 0.061289 | 0.058333   |
| L vs T                     | 0.0343   | 0.433      |
| P vs T                     | 0.07249  | 0.16       |
|                            |          |            |
| <b>Groups</b>              |          |            |
| noab vs cef                | 0.119442 | 0.0015     |
| noab vs ubro               | 0.109254 | 0.0015     |
| cef vs ubro                | 0.026913 | 0.15       |
|                            |          |            |
| <b>Parity</b>              |          |            |
| Primiparous vs Nulliparous | 0.05982  | 0.003      |
| Primiparous vs Multiparous | 0.012442 | 0.418      |
| Nulliparous vs Multiparous | 0.114919 | 0.0045     |

**Table S2.** Metadata showing details of all cows included in this study.

| Clade | Group | Age | Timepoint | Parity | Parous      | Subject |
|-------|-------|-----|-----------|--------|-------------|---------|
| D16T1 | cef   | 4   | T1        | 2      | Multiparous | D16     |
| L10C  | ubro  | 5   | T0        | 3      | Multiparous | L10     |
| T8T3  | ubro  | 5   | T3        | 3      | Multiparous | T8      |
| P10T2 | cef   | 3   | T2        | 1      | Primiparous | P10     |
| T17T3 | ubro  | 3   | T3        | 1      | Primiparous | T17     |
| T17C  | ubro  | 3   | T0        | 1      | Primiparous | T17     |
| C16T1 | noab  | 2   | T1        | 0      | Nulliparous | C16     |
| C16C  | noab  | 2   | T0        | 0      | Nulliparous | C16     |
| D13C  | cef   | 3   | T0        | 1      | Primiparous | D13     |
| C12T1 | noab  | 3   | T1        | 1      | Primiparous | C12     |
| D16T3 | cef   | 4   | T3        | 2      | Multiparous | D16     |
| C19C  | noab  | 2   | T0        | 0      | Nulliparous | C19     |
| L6T1  | ubro  | 3   | T1        | 1      | Primiparous | L6      |
| P10C  | cef   | 3   | T0        | 1      | Primiparous | P10     |
| L11C  | ubro  | 5   | T0        | 3      | Multiparous | L11     |
| L5C   | ubro  | 3   | T0        | 1      | Primiparous | L5      |
| C12T3 | noab  | 3   | T3        | 1      | Primiparous | C12     |
| C16T3 | noab  | 2   | T3        | 0      | Nulliparous | C16     |
| C1T2  | noab  | 3   | T2        | 1      | Primiparous | C1      |
| L6T2  | ubro  | 3   | T2        | 1      | Primiparous | L6      |
| C16T2 | noab  | 2   | T2        | 0      | Nulliparous | C16     |
| C3T1  | noab  | 3   | T1        | 1      | Primiparous | C3      |

|       |      |   |    |   |             |     |
|-------|------|---|----|---|-------------|-----|
| P9T1  | cef  | 3 | T1 | 1 | Primiparous | P9  |
| L10T1 | ubro | 5 | T1 | 3 | Multiparous | L10 |
| L6T3  | ubro | 3 | T3 | 1 | Primiparous | L6  |
| C5T1  | noab | 2 | T1 | 0 | Nulliparous | C5  |
| C5T3  | noab | 2 | T3 | 0 | Nulliparous | C5  |
| P9C   | cef  | 3 | T0 | 1 | Primiparous | P9  |
| D17T3 | cef  | 4 | T3 | 2 | Multiparous | D17 |
| P10T3 | cef  | 3 | T3 | 1 | Primiparous | P10 |
| C4T3  | noab | 2 | T3 | 0 | Nulliparous | C4  |
| L13T2 | ubro | 3 | T2 | 1 | Primiparous | L13 |
| P20T1 | cef  | 3 | T1 | 1 | Primiparous | P20 |
| L5T1  | ubro | 3 | T1 | 1 | Primiparous | L5  |
| D17C  | cef  | 4 | T0 | 2 | Multiparous | D17 |
| L11T1 | ubro | 5 | T1 | 3 | Multiparous | L11 |
| C2T1  | noab | 2 | T1 | 0 | Nulliparous | C2  |
| C12C  | noab | 3 | T0 | 1 | Primiparous | C12 |
| C7T3  | noab | 3 | T3 | 1 | Primiparous | C7  |
| L11T3 | ubro | 5 | T3 | 3 | Multiparous | L11 |
| T8T1  | ubro | 5 | T1 | 3 | Multiparous | T8  |
| D16T2 | cef  | 4 | T2 | 2 | Multiparous | D16 |
| L11T2 | ubro | 5 | T2 | 3 | Multiparous | L11 |
| D17T1 | cef  | 4 | T1 | 2 | Multiparous | D17 |
| D9C   | cef  | 3 | T0 | 1 | Primiparous | D9  |
| P20C  | cef  | 3 | T0 | 1 | Primiparous | P20 |

|       |      |   |    |   |             |     |
|-------|------|---|----|---|-------------|-----|
| P10T1 | cef  | 3 | T1 | 1 | Primiparous | P10 |
| C19T1 | noab | 2 | T1 | 0 | Nulliparous | C19 |
| C3C   | noab | 3 | T0 | 1 | Primiparous | C3  |
| C1T3  | noab | 3 | T3 | 1 | Primiparous | C1  |
| L13T1 | ubro | 3 | T1 | 1 | Primiparous | L13 |
| C7T1  | noab | 3 | T1 | 1 | Primiparous | C7  |
| C5T2  | noab | 2 | T2 | 0 | Nulliparous | C5  |
| C2C   | noab | 2 | T0 | 0 | Nulliparous | C2  |
| C1T1  | noab | 3 | T1 | 1 | Primiparous | C1  |
| T17T2 | ubro | 3 | T2 | 1 | Primiparous | T17 |
| L13C  | ubro | 3 | T0 | 1 | Primiparous | L13 |
| D17T2 | cef  | 4 | T2 | 2 | Multiparous | D17 |
| L6C   | ubro | 3 | T0 | 1 | Primiparous | L6  |
| L10T3 | ubro | 5 | T3 | 3 | Multiparous | L10 |
| D13T3 | cef  | 3 | T3 | 1 | Primiparous | D13 |
| D13T1 | cef  | 3 | T1 | 1 | Primiparous | D13 |
| C3T2  | noab | 3 | T2 | 1 | Primiparous | C3  |
| C19T2 | noab | 2 | T2 | 0 | Nulliparous | C19 |
| P19C  | cef  | 3 | T0 | 1 | Primiparous | P19 |
| P19T3 | cef  | 3 | T3 | 1 | Primiparous | P19 |
| C1C   | noab | 3 | T0 | 1 | Primiparous | C1  |
| L13T3 | ubro | 3 | T3 | 1 | Primiparous | L13 |
| P9T3  | cef  | 3 | T3 | 1 | Primiparous | P9  |
| L10T2 | ubro | 5 | T2 | 3 | Multiparous | L10 |

|       |      |   |    |   |             |     |
|-------|------|---|----|---|-------------|-----|
| P9T2  | cef  | 3 | T2 | 1 | Primiparous | P9  |
| C7T2  | noab | 3 | T2 | 1 | Primiparous | C7  |
| D16C  | cef  | 4 | T0 | 2 | Multiparous | D16 |
| C4T1  | noab | 2 | T1 | 0 | Nulliparous | C4  |
| T8C   | ubro | 5 | T0 | 3 | Multiparous | T8  |
| P20T2 | cef  | 3 | T2 | 1 | Primiparous | P20 |
| C4C   | noab | 2 | T0 | 0 | Nulliparous | C4  |
| P19T1 | cef  | 3 | T1 | 1 | Primiparous | P19 |
| C7C   | noab | 3 | T0 | 1 | Primiparous | C7  |
| D9T2  | cef  | 3 | T2 | 1 | Primiparous | D9  |
| T8T2  | ubro | 5 | T2 | 3 | Multiparous | T8  |
| C5C   | noab | 2 | T0 | 0 | Nulliparous | C5  |
| L5T3  | ubro | 3 | T3 | 1 | Primiparous | L5  |
| L5T2  | ubro | 3 | T2 | 1 | Primiparous | L5  |
| C2T3  | noab | 2 | T3 | 0 | Nulliparous | C2  |
| T17T1 | ubro | 3 | T1 | 1 | Primiparous | T17 |
| P20T3 | cef  | 3 | T3 | 1 | Primiparous | P20 |
| C19T3 | noab | 2 | T3 | 0 | Nulliparous | C19 |
| C12T2 | noab | 3 | T2 | 1 | Primiparous | C12 |
| D9T1  | cef  | 3 | T1 | 1 | Primiparous | D9  |
| C4T2  | noab | 2 | T2 | 0 | Nulliparous | C4  |
| D13T2 | cef  | 3 | T2 | 1 | Primiparous | D13 |
| D9T3  | cef  | 3 | T3 | 1 | Primiparous | D9  |
| C3T3  | noab | 3 | T3 | 1 | Primiparous | C3  |

|       |      |   |    |   |             |     |
|-------|------|---|----|---|-------------|-----|
| C2T2  | noab | 2 | T2 | 0 | Nulliparous | C2  |
| P19T2 | cef  | 3 | T2 | 1 | Primiparous | P19 |

**Table S3.** Table showing coefficients obtained from differential abundance analysis using Songbird tool with formula C (Group, Treatment('NOAB')).

| featureid                                                                                                          | Intercept | C(Group2, Treatment('noab'))[T.cef] | C(Group2, Treatment('noab'))[T.ubro] |
|--------------------------------------------------------------------------------------------------------------------|-----------|-------------------------------------|--------------------------------------|
| k__Bacteria p__Proteobacteria c__Gammaproteobacteria o__Pseudomonadales f__Moraxellaceae g__ <i>Psychrobacter</i>  | -0.48714  | -0.49549                            | -0.49071                             |
| k__Bacteria p__Proteobacteria c__Gammaproteobacteria o__Pseudomonadales f__Moraxellaceae g__ <i>Acinetobacter</i>  | 0.104539  | 0.021822                            | 0.20377                              |
| k__Bacteria p__Proteobacteria c__Gammaproteobacteria o__Pseudomonadales f__Moraxellaceae g__ <i>Moraxella</i>      | -0.18873  | -0.06052                            | -0.03973                             |
| k__Bacteria p__Proteobacteria c__Gammaproteobacteria o__Pseudomonadales f__Pseudomonadaceae g__ <i>Pseudomonas</i> | 0.822938  | 0.23601                             | 0.118122                             |
| k__Bacteria p__Proteobacteria c__Gammaproteobacteria o__Enterobacterales f__Enterobacteriaceae g__                 | -0.22715  | -0.06166                            | -0.05006                             |



|                                                                                                                         |              |          |          |
|-------------------------------------------------------------------------------------------------------------------------|--------------|----------|----------|
| k__Bacteria p__Proteobacteria c__Gammaproteobacteria o__Enterobacterales f__Enterobacteriaceae g__ <i>Escherichia</i>   | -0.21432     | -0.06126 | -0.04628 |
| k__Bacteria p__Proteobacteria c__Gammaproteobacteria o__Enterobacterales f__Yersiniaceae g__ <i>Serratia</i>            | -0.2413      | -0.06436 | -0.05548 |
| k__Bacteria p__Proteobacteria c__Gammaproteobacteria o__Enterobacterales f__Erwiniaceae g__ <i>Buchnera</i>             | -0.21317     | -0.06081 | -0.04642 |
| k__Bacteria p__Proteobacteria c__Gammaproteobacteria o__Enterobacterales f__Pectobacteriaceae g__ <i>Sodalis</i>        | -0.21525     | -0.05879 | -0.04835 |
| k__Bacteria p__Proteobacteria c__Gammaproteobacteria o__Xanthomonadales f__Xanthomonadaceae g__                         | -0.20194     | -0.05346 | -0.04568 |
| k__Bacteria p__Proteobacteria c__Gammaproteobacteria o__Xanthomonadales f__Xanthomonadaceae g__ <i>Stenotrophomonas</i> | 0.34068<br>4 | 0.166177 | 0.065002 |
| k__Bacteria p__Proteobacteria c__Gammaproteobacteria o__Xanthomonadales f__Xanthomonadaceae g__ <i>Lyso bacter</i>      | 0.25963<br>5 | 0.25292  | -0.01833 |
| k__Bacteria p__Proteobacteria c__Gammaproteobacteria o__Methylococcales f__Methylococcaceae g__ <i>Methylovulum</i>     | -0.21223     | -0.0552  | -0.03209 |
| k__Bacteria p__Proteobacteria c__Alphaproteobacteria o__Rhodobacterales f__Rhodobacteraceae g__                         | -0.19415     | -0.06025 | -0.02359 |

|                                                                                                                          |          |          |          |
|--------------------------------------------------------------------------------------------------------------------------|----------|----------|----------|
| k__Bacteria p__Proteobacteria c__Alphaproteobacteri<br>a o__Rhodobacterales f__Rhodobacteraceae g__ <i>Paracoccus</i>    | -0.11266 | -0.05799 | 0.06665  |
| k__Bacteria p__Proteobacteria c__Alphaproteobacteri<br>a o__Rhodobacterales f__Rhodobacteraceae g__ <i>Rhodobacter</i>   | -0.21346 | -0.06027 | -0.03847 |
| k__Bacteria p__Proteobacteria c__Alphaproteobacteri<br>a o__Rhizobiales f__ g__                                          | -0.15449 | -0.02776 | -0.02639 |
| k__Bacteria p__Proteobacteria c__Alphaproteobacteri<br>a o__Rhizobiales f__Phyllobacteriaceae g__ <i>Mesorhizobium</i>   | -0.19888 | -0.04567 | -0.04165 |
| k__Bacteria p__Proteobacteria c__Alphaproteobacteri<br>a o__Rhizobiales f__Phyllobacteriaceae g__ <i>Aminobacter</i>     | -0.20662 | -0.04857 | -0.04445 |
| k__Bacteria p__Proteobacteria c__Alphaproteobacteri<br>a o__Rhizobiales f__Phyllobacteriaceae g__ <i>Phyllobacterium</i> | -0.21616 | -0.04196 | -0.05048 |
| k__Bacteria p__Proteobacteria c__Alphaproteobacteri<br>a o__Rhizobiales f__Bradyrhizobiaceae g__ <i>Rhodopseudomonas</i> | -0.2002  | -0.04949 | -0.04099 |
| k__Bacteria p__Proteobacteria c__Alphaproteobacteri<br>a o__Rhizobiales f__Brucellaceae g__ <i>Ochrobactrum</i>          | -0.18801 | -0.0127  | -0.05095 |
| k__Bacteria p__Proteobacteria c__Alphaproteobacteri<br>a o__Caulobacterales f__Caulobacteraceae g__ <i>Brevundimonas</i> | -0.21691 | -0.05234 | -0.04544 |

|                                                                                                                                       |              |          |          |
|---------------------------------------------------------------------------------------------------------------------------------------|--------------|----------|----------|
| k__Bacteria p__Proteobacteria c__Betaproteobacteria <br>o__Burkholderiales f__ g__                                                    | -0.17826     | -0.03499 | -0.0341  |
| k__Bacteria p__Proteobacteria c__Betaproteobacteria <br>o__Burkholderiales f__Comamonadaceae g__                                      | -0.16555     | -0.01551 | -0.03083 |
| k__Bacteria p__Proteobacteria c__Betaproteobacteria <br>o__Burkholderiales f__Comamonadaceae g__ <i>Comamonas</i>                     | -0.20775     | -0.04027 | -0.04723 |
| k__Bacteria p__Proteobacteria c__Betaproteobacteria <br>o__Burkholderiales f__Comamonadaceae g__ <i>Variovorax</i>                    | -0.1943      | -0.05054 | -0.03201 |
| k__Bacteria p__Proteobacteria c__Betaproteobacteria <br>o__Burkholderiales f__Comamonadaceae g__ <i>Delftia</i>                       | -0.01807     | 0.130668 | -0.03337 |
| k__Bacteria p__Proteobacteria c__Betaproteobacteria <br>o__Burkholderiales f__Comamonadaceae g__ <i>Ottowia</i>                       | 0.18739<br>1 | 0.303989 | 0.04468  |
| k__Bacteria p__Proteobacteria c__Betaproteobacteria <br>o__Burkholderiales f__Alcaligenaceae g__ <i>Alcaligenes</i>                   | -0.09802     | 0.096201 | -0.06153 |
| k__Bacteria p__Proteobacteria c__Betaproteobacteria <br>o__Burkholderiales f__Burkholderiaceae g__ <i>Polynucl</i><br><i>eobacter</i> | 0.20290<br>5 | 0.07999  | 0.046725 |
| k__Bacteria p__Proteobacteria c__Betaproteobacteria <br>o__Burkholderiales f__Oxalobacteraceae g__ <i>Janthinobacterium</i>           | -0.20971     | -0.03783 | -0.05259 |
| k__Bacteria p__Actinobacteria c__Actinobacteria o__<br>Micrococcales f__ g__                                                          | -0.02247     | -0.01838 | 0.018418 |

|                                                                                                                 |              |          |          |
|-----------------------------------------------------------------------------------------------------------------|--------------|----------|----------|
| k__Bacteria p__Actinobacteria c__Actinobacteria o__Micrococcales f__Micrococcaceae g__                          | -0.13686     | -0.04669 | -0.02187 |
| k__Bacteria p__Actinobacteria c__Actinobacteria o__Micrococcales f__Micrococcaceae g__ <i>Arthrobacter</i>      | 0.20615<br>4 | -0.02504 | 0.030991 |
| k__Bacteria p__Actinobacteria c__Actinobacteria o__Micrococcales f__Micrococcaceae g__ <i>Glutamicibacter</i>   | -0.14841     | -0.05916 | -0.02827 |
| k__Bacteria p__Actinobacteria c__Actinobacteria o__Micrococcales f__Micrococcaceae g__ <i>Kocuria</i>           | 0.72771<br>9 | 0.393234 | 0.473597 |
| k__Bacteria p__Actinobacteria c__Actinobacteria o__Micrococcales f__Micrococcaceae g__ <i>Rothia</i>            | -0.21063     | -0.06299 | -0.04428 |
| k__Bacteria p__Actinobacteria c__Actinobacteria o__Micrococcales f__Micrococcaceae g__ <i>Micrococcus</i>       | -0.13219     | -0.05269 | 0.026983 |
| k__Bacteria p__Actinobacteria c__Actinobacteria o__Micrococcales f__Micrococcaceae g__ <i>Sinomonas</i>         | -0.2013      | -0.05532 | -0.03988 |
| k__Bacteria p__Actinobacteria c__Actinobacteria o__Micrococcales f__Microbacteriaceae g__                       | -0.16104     | -0.04075 | -0.02757 |
| k__Bacteria p__Actinobacteria c__Actinobacteria o__Micrococcales f__Microbacteriaceae g__ <i>Microbacterium</i> | 0.87803<br>9 | 0.503077 | 0.209511 |
| k__Bacteria p__Actinobacteria c__Actinobacteria o__Micrococcales f__Microbacteriaceae g__ <i>Agromyces</i>      | -0.20839     | -0.05587 | -0.04294 |
| k__Bacteria p__Actinobacteria c__Actinobacteria o__Micrococcales f__Microbacteriaceae g__ <i>Clavibacter</i>    | -0.20502     | -0.05873 | -0.04458 |

|                                                                                                                   |              |          |          |
|-------------------------------------------------------------------------------------------------------------------|--------------|----------|----------|
| k__Bacteria p__Actinobacteria c__Actinobacteria o__Micrococcales f__Microbacteriaceae g__ <i>Leifsonia</i>        | -0.19225     | -0.05052 | -0.03915 |
| k__Bacteria p__Actinobacteria c__Actinobacteria o__Micrococcales f__Microbacteriaceae g__ <i>Microterricola</i>   | -0.21058     | -0.05393 | -0.04648 |
| k__Bacteria p__Actinobacteria c__Actinobacteria o__Micrococcales f__Microbacteriaceae g__ <i>Fronihabitans</i>    | -0.21036     | -0.05969 | -0.04549 |
| k__Bacteria p__Actinobacteria c__Actinobacteria o__Micrococcales f__Dermabacteraceae g__ <i>Brachybacterium</i>   | 1.10025<br>5 | -0.10812 | -0.01632 |
| k__Bacteria p__Actinobacteria c__Actinobacteria o__Micrococcales f__Intrasporangiaceae g__ <i>Janibacter</i>      | -0.1361      | -0.05692 | 0.026611 |
| k__Bacteria p__Actinobacteria c__Actinobacteria o__Micrococcales f__Intrasporangiaceae g__ <i>Intrasporangium</i> | -0.18586     | -0.05871 | -0.03145 |
| k__Bacteria p__Actinobacteria c__Actinobacteria o__Micrococcales f__Intrasporangiaceae g__ <i>Serinicoccus</i>    | -0.18811     | -0.05803 | -0.02364 |
| k__Bacteria p__Actinobacteria c__Actinobacteria o__Micrococcales f__Intrasporangiaceae g__ <i>Arsenicicoccus</i>  | -0.18527     | -0.05417 | -0.02229 |
| k__Bacteria p__Actinobacteria c__Actinobacteria o__Micrococcales f__Brevibacteriaceae g__ <i>Brevibacterium</i>   | 1.51072<br>3 | -0.26926 | -0.25562 |

|                                                                                                                       |          |          |          |
|-----------------------------------------------------------------------------------------------------------------------|----------|----------|----------|
| k__Bacteria p__Actinobacteria c__Actinobacteria o__Micrococcales f__Dermacoccaceae g__ <i>Luteipulveratus</i>         | -0.2025  | -0.05754 | -0.03512 |
| k__Bacteria p__Actinobacteria c__Actinobacteria o__Micrococcales f__Dermacoccaceae g__ <i>Kytococcus</i>              | -0.20443 | -0.05523 | -0.03523 |
| k__Bacteria p__Actinobacteria c__Actinobacteria o__Micrococcales f__Dermacoccaceae g__ <i>Dermacoccus</i>             | -0.19912 | -0.05235 | -0.03468 |
| k__Bacteria p__Actinobacteria c__Actinobacteria o__Micrococcales f__Beutenbergiaceae g__ <i>Beutenbergia</i>          | -0.21159 | -0.0552  | -0.04207 |
| k__Bacteria p__Actinobacteria c__Actinobacteria o__Micrococcales f__Beutenbergiaceae g__ <i>Miniimonas</i>            | -0.19863 | -0.05425 | -0.0283  |
| k__Bacteria p__Actinobacteria c__Actinobacteria o__Micrococcales f__Sanguibacteraceae g__ <i>Sanguibacter</i>         | -0.20739 | -0.0561  | -0.0427  |
| k__Bacteria p__Actinobacteria c__Actinobacteria o__Corynebacteriales f__ g__                                          | -0.10821 | -0.01763 | -0.00379 |
| k__Bacteria p__Actinobacteria c__Actinobacteria o__Corynebacteriales f__Corynebacteriaceae g__ <i>Corynebacterium</i> | 1.661905 | -0.00768 | 0.438415 |
| k__Bacteria p__Actinobacteria c__Actinobacteria o__Corynebacteriales f__Nocardiaceae g__ <i>Rhodococcus</i>           | 1.499408 | 0.988738 | 0.605951 |
| k__Bacteria p__Actinobacteria c__Actinobacteria o__Corynebacteriales f__Dietziaceae g__ <i>Dietzia</i>                | -0.11913 | -0.04926 | 0.010988 |
| k__Bacteria p__Actinobacteria c__Actinobacteria o__Corynebacteriales f__Mycobacteriaceae g__                          | -0.1052  | 0.019298 | -0.01502 |

|                                                                                                                      |              |          |          |
|----------------------------------------------------------------------------------------------------------------------|--------------|----------|----------|
| k__Bacteria p__Actinobacteria c__Actinobacteria o__Corynebacteriales f__Mycobacteriaceae g__ <i>Mycobacterium</i>    | -0.07432     | 0.0247   | -0.00822 |
| k__Bacteria p__Actinobacteria c__Actinobacteria o__Corynebacteriales f__Mycobacteriaceae g__ <i>Mycobacteroides</i>  | 0.21090<br>5 | 0.297149 | 0.065613 |
| k__Bacteria p__Actinobacteria c__Actinobacteria o__Corynebacteriales f__Tsukamurellaceae g__ <i>Tsukamurella</i>     | -0.17258     | -0.01866 | -0.04098 |
| k__Bacteria p__Actinobacteria c__Actinobacteria o__Streptomycetales f__Streptomycetaceae g__ <i>Streptomyces</i>     | 0.04393      | 0.025371 | 0.039756 |
| k__Bacteria p__Actinobacteria c__Actinobacteria o__Pseudonocardiales f__Pseudonocardiaceae g__ <i>Actinomyces</i>    | 3.22857<br>3 | 0.130644 | 0.527985 |
| k__Bacteria p__Actinobacteria c__Actinobacteria o__Pseudonocardiales f__Pseudonocardiaceae g__ <i>Pseudonocardia</i> | -0.20553     | -0.05877 | -0.03884 |
| k__Bacteria p__Actinobacteria c__Actinobacteria o__Propionibacteriales f__Nocardioidaceae g__ <i>Nocardioideae</i>   | -0.08152     | -0.03465 | 0.019309 |
| k__Bacteria p__Actinobacteria c__Actinobacteria o__Propionibacteriales f__Nocardioidaceae g__ <i>Aeromicrobium</i>   | -0.20082     | -0.05963 | -0.04363 |

|                                                                                                                                   |          |          |          |
|-----------------------------------------------------------------------------------------------------------------------------------|----------|----------|----------|
| k__Bacteria p__Actinobacteria c__Actinobacteria o__Propionibacteriales f__Nocardiodaceae g__ <i>Pimelobacter</i>                  | -0.18516 | -0.05011 | -0.03011 |
| k__Bacteria p__Actinobacteria c__Actinobacteria o__Propionibacteriales f__Nocardiodaceae g__ <i>Kribbella</i>                     | -0.21425 | -0.05734 | -0.04205 |
| k__Bacteria p__Actinobacteria c__Actinobacteria o__Propionibacteriales f__Nocardiodaceae g__ <i>Micropruina</i>                   | -0.1825  | -0.04948 | -0.02635 |
| k__Bacteria p__Actinobacteria c__Actinobacteria o__Propionibacteriales f__Propionibacteriaceae g__                                | -0.17764 | -0.02195 | -0.03498 |
| k__Bacteria p__Actinobacteria c__Actinobacteria o__Propionibacteriales f__Propionibacteriaceae g__ <i>Tessaracoccus</i>           | -0.05011 | -0.00429 | 0.034666 |
| k__Bacteria p__Actinobacteria c__Actinobacteria o__Propionibacteriales f__Propionibacteriaceae g__ <i>Acidipropionibacterium</i>  | 0.09655  | 0.175055 | 0.057006 |
| k__Bacteria p__Actinobacteria c__Actinobacteria o__Propionibacteriales f__Propionibacteriaceae g__ <i>Cutibacterium</i>           | -0.15491 | -0.03241 | -0.03512 |
| k__Bacteria p__Actinobacteria c__Actinobacteria o__Propionibacteriales f__Propionibacteriaceae g__ <i>Propionibacterium</i>       | -0.0024  | 0.079033 | 0.044894 |
| k__Bacteria p__Actinobacteria c__Actinobacteria o__Propionibacteriales f__Propionibacteriaceae g__ <i>Micro</i><br><i>lunatus</i> | -0.18241 | -0.05756 | -0.01455 |



|                                                                                                                                   |              |          |          |
|-----------------------------------------------------------------------------------------------------------------------------------|--------------|----------|----------|
| k__Bacteria p__Actinobacteria c__Actinobacteria o__Micromonosporales f__Micromonosporaceae g__ <i>Plan</i><br><i>tactinospora</i> | 0.27886<br>7 | 0.040809 | 0.097554 |
| k__Bacteria p__Actinobacteria c__Actinobacteria o__Bifidobacteriales f__Bifidobacteriaceae g__ <i>Bifidobact</i><br><i>erium</i>  | 0.10377<br>2 | 0.083442 | 0.033794 |
| k__Bacteria p__Actinobacteria c__Actinobacteria o__Nakamurellales f__Nakamurellaceae g__ <i>Nakamurella</i>                       | -0.19973     | -0.04952 | -0.03668 |
| k__Bacteria p__Actinobacteria c__Coriobacteriia o__Eggerthellales f__Eggerthellaceae g__ <i>Gordonibacter</i>                     | -0.0631      | -0.07634 | -0.06444 |
| k__Bacteria p__Actinobacteria c__Thermoleophilia o__Solirubrobacterales f__Conexibacteraceae g__ <i>Conexi</i><br><i>bacter</i>   | -0.1998      | -0.03787 | -0.04831 |
| k__Bacteria p__Firmicutes c__Bacilli o__Lactobacilla<br>les f__ g__                                                               | -0.20243     | -0.04009 | -0.04365 |
| k__Bacteria p__Firmicutes c__Bacilli o__Lactobacilla<br>les f__Streptococcaceae g__ <i>Streptococcus</i>                          | -0.17518     | -0.00236 | -0.04769 |
| k__Bacteria p__Firmicutes c__Bacilli o__Lactobacilla<br>les f__Streptococcaceae g__ <i>Lactococcus</i>                            | -0.06575     | 0.08604  | -0.02159 |
| k__Bacteria p__Firmicutes c__Bacilli o__Lactobacilla<br>les f__Lactobacillaceae g__                                               | -0.22052     | -0.04908 | -0.04804 |
| k__Bacteria p__Firmicutes c__Bacilli o__Lactobacilla<br>les f__Lactobacillaceae g__ <i>Lactobacillus</i>                          | 0.15505<br>3 | 0.21733  | 0.090622 |
| k__Bacteria p__Firmicutes c__Bacilli o__Lactobacilla<br>les f__Enterococcaceae g__ <i>Enterococcus</i>                            | -0.20221     | -0.04571 | -0.03201 |

|                                                                                                                                     |              |          |          |
|-------------------------------------------------------------------------------------------------------------------------------------|--------------|----------|----------|
| k__Bacteria p__Firmicutes c__Bacilli o__Lactobacilla<br>les f__Leuconostocaceae g__ <i>Leuconostoc</i>                              | -0.17699     | -0.02222 | -0.03086 |
| k__Bacteria p__Firmicutes c__Bacilli o__Bacillales f__<br>_Staphylococcaceae g__ <i>Staphylococcus</i>                              | 0.24150<br>2 | -0.05603 | -0.02029 |
| k__Bacteria p__Firmicutes c__Clostridia o__Clostridi<br>ales f__Clostridiaceae g__ <i>Clostridium</i>                               | -0.14928     | -0.0416  | -0.03513 |
| k__Bacteria p__Firmicutes c__Negativicutes o__Veill<br>onellales f__Veillonellaceae g__ <i>Negativicoccus</i>                       | 0.16691<br>4 | 0.013254 | 0.064588 |
| k__Bacteria p__Deinococcus-<br>Thermus c__Deinococci o__Deinococcales f__Deinoc<br>occaceae g__ <i>Deinococcus</i>                  | -0.21875     | -0.06637 | -0.02945 |
| k__Bacteria p__Tenericutes c__Mollicutes o__Mycopl<br>asmatales f__Mycoplasmataceae g__ <i>Mycoplasma</i>                           | -0.20723     | -0.05714 | -0.04786 |
| k__Bacteria p__Bacteroidetes c__Sphingobacteriia o__<br>_Sphingobacteriales f__Sphingobacteriaceae g__ <i>Sphin<br/>gobacterium</i> | -0.22744     | -0.06315 | -0.05452 |
| k__Bacteria p__Bacteroidetes c__Flavobacteriia o__Fl<br>avobacteriales f__Flavobacteriaceae g__ <i>Chryseobacte<br/>rium</i>        | -0.16978     | 0.000731 | -0.0474  |
| k__Bacteria p__Verrucomicrobia c__ o__ f__ g__                                                                                      | -0.20056     | -0.05548 | -0.04549 |
